# Supplementary material for: Perception of root‐active CLE peptides requires CORYNE function in the phloem vasculature
Source: PubMed Central journal article supplement (PMC5538625; doi:10.15252/embr.201643535), 2017-06-12
Supplement: EMBR-18-0-s001.pdf [file EMBR-18-0-s001.pdf]

## Expanded View Figures

### Figure EV1. BAM3-CLE45 control experiments and *bam3* alleles.

- A Relative primary root length of indicated genotypes at 9 dag, in response to increasing amounts of CLE45 in the media.  $n = 12$  for each genotype, mean  $\pm$  s.e.m. All differences as compared to wild type were statistically significant (Student's *t*-test) with  $P < 0.001$  for 15 and 50 nM, and  $P < 0.05$  for 100 nM.
- B ITC of purified PXY extracellular domain vs. CLV41/44 peptide. n.d.: not detectable. N: stoichiometry,  $K_d$  dissociation constant. Shown are experimental values  $\pm$  fitting errors (95% confidence interval).
- C ITC of purified BAM3 extracellular domain vs. CLV3 peptide.
- D ITC of purified BAM3 extracellular domain vs. an N-terminally tyrosine-modified CLV3 peptide.
- E ITC of purified BAM3 extracellular domain vs. an N-terminally tyrosine-modified CLE45 peptide.
- F Representative 9-day-old Col-0 seedlings grown on mock or in presence of indicated peptides.

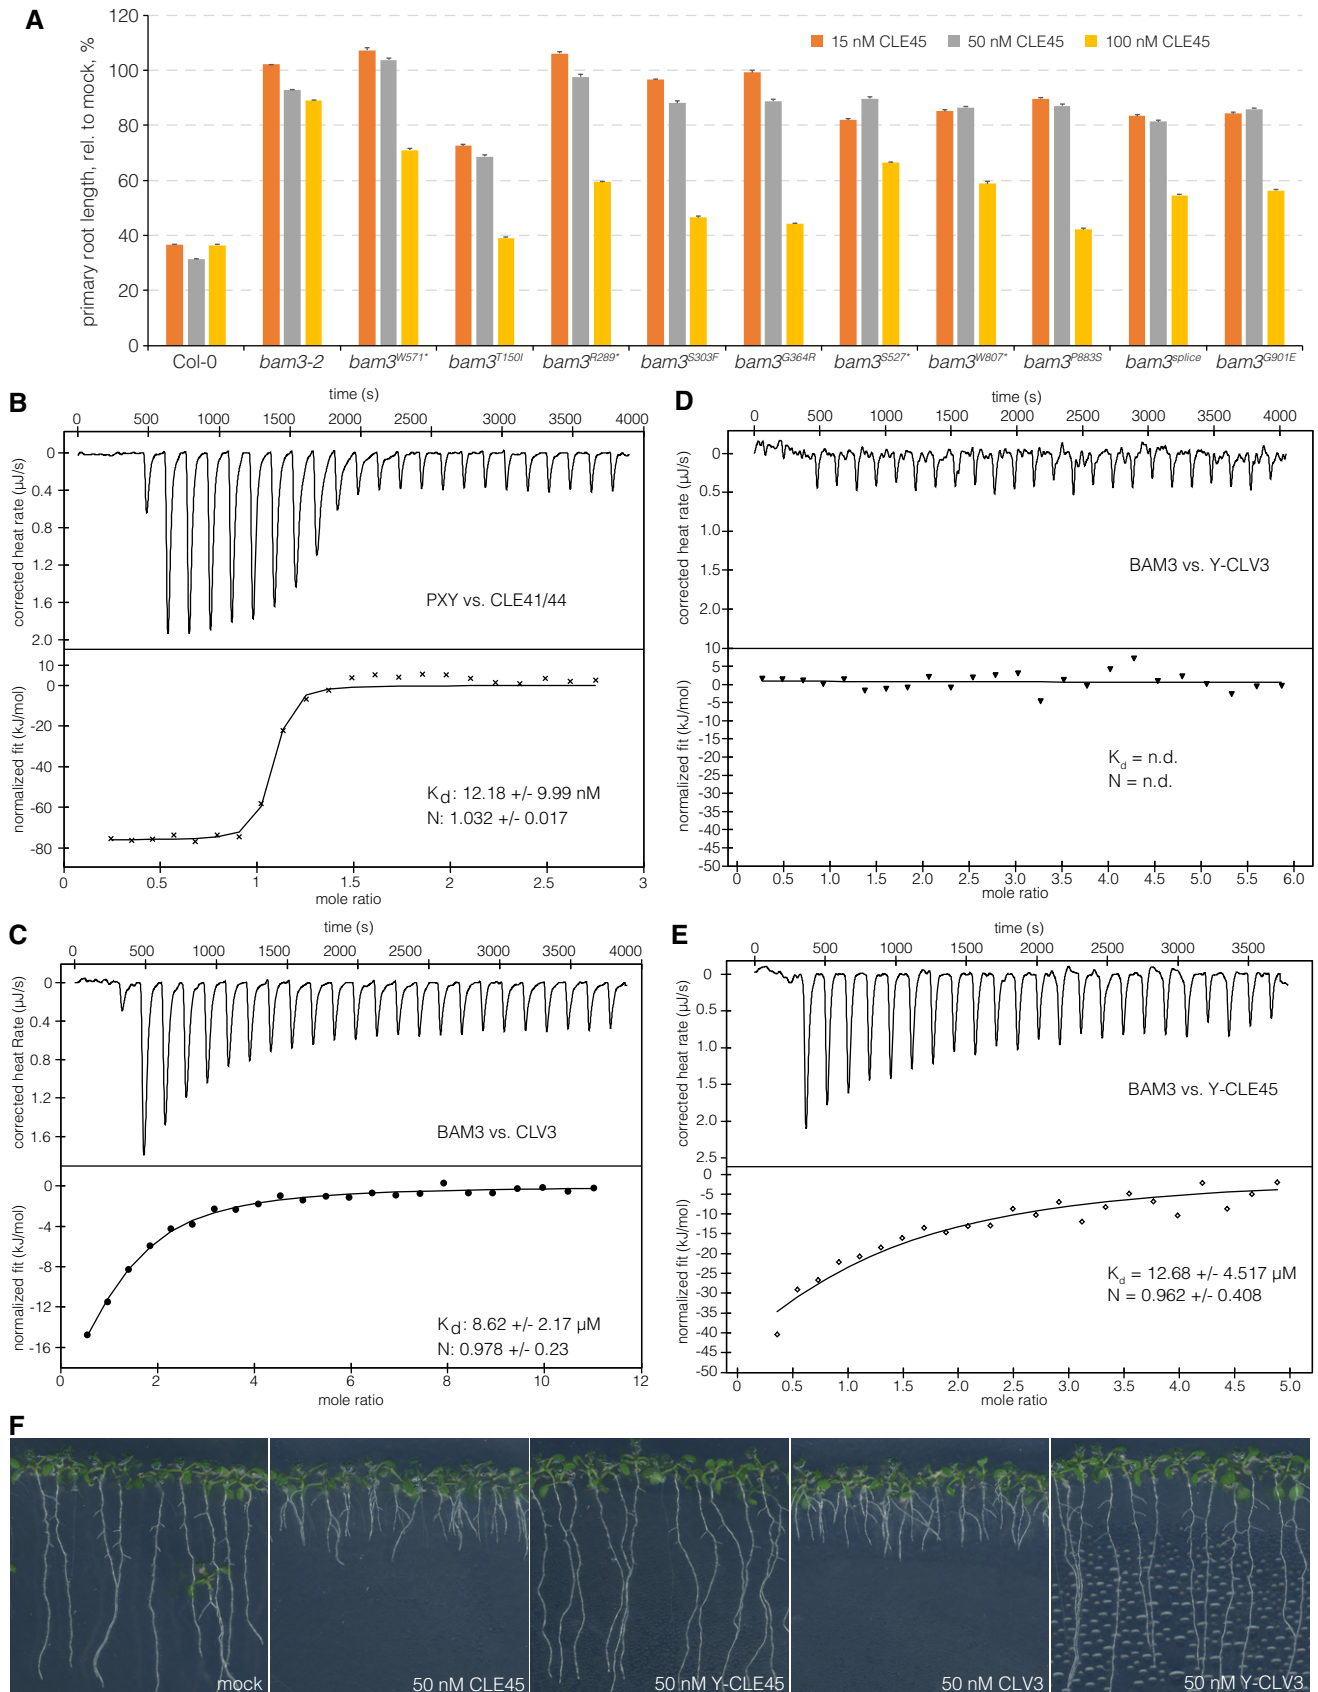

Figure EV1.

**Figure EV2. BAM3 localization and biochemical control experiments.**

- A Transient expression of BAM3 wild-type or mutant BAM3<sup>QYY</sup> CITRINE fusion proteins (green fluorescence) in tobacco leaf epidermal cells, under control of a constitutive promoter (confocal microscopy).
- B Close-up of developing protophloem sieve element cell files expressing BAM3 wild-type or mutant BAM3<sup>QYY</sup> CITRINE fusion proteins (green fluorescence).
- C, D Primary root length of 7-day-old seedlings of indicated genotypes on mock or CLE45 media, several independent lines per transgene construct are shown. Differences as compared to mock are not statistically significant unless indicated (Student's *t*-test); \**P* < 0.05; \*\**P* < 0.01; \*\*\**P* < 0.001; mean ± s.e.m.
- E Transphosphorylation kinase assays with purified BAM3 kinase domain (BAM3-KD) or SERK1 kinase domain (SERK1-KD) as well as kinase dead point mutant versions (mBAM3-KD & mSERK1-KD) alone and in combination.
- F Analytical size-exclusion chromatography of purified BAM3 and SERK3 extracellular domains in the presence of CLE45 peptide reveals no ligand-induced complex formation between BAM3 and SERK3.
- G Analytical size-exclusion chromatography of purified PXY and SERK1 extracellular domains in the presence of CLE41/44 peptide reveals CLE41/44-induced binding of SERK1 to the PXY ectodomain.
- H Expression of SERK1-CITRINE fusion protein (green fluorescence) under control of the native *SERK1* promoter (blue fluorescence: calcofluor white cell wall staining). Green channel is shown separately (left) and in overlay with blue channel (right). Asterisk indicates the developing sieve element cell file.

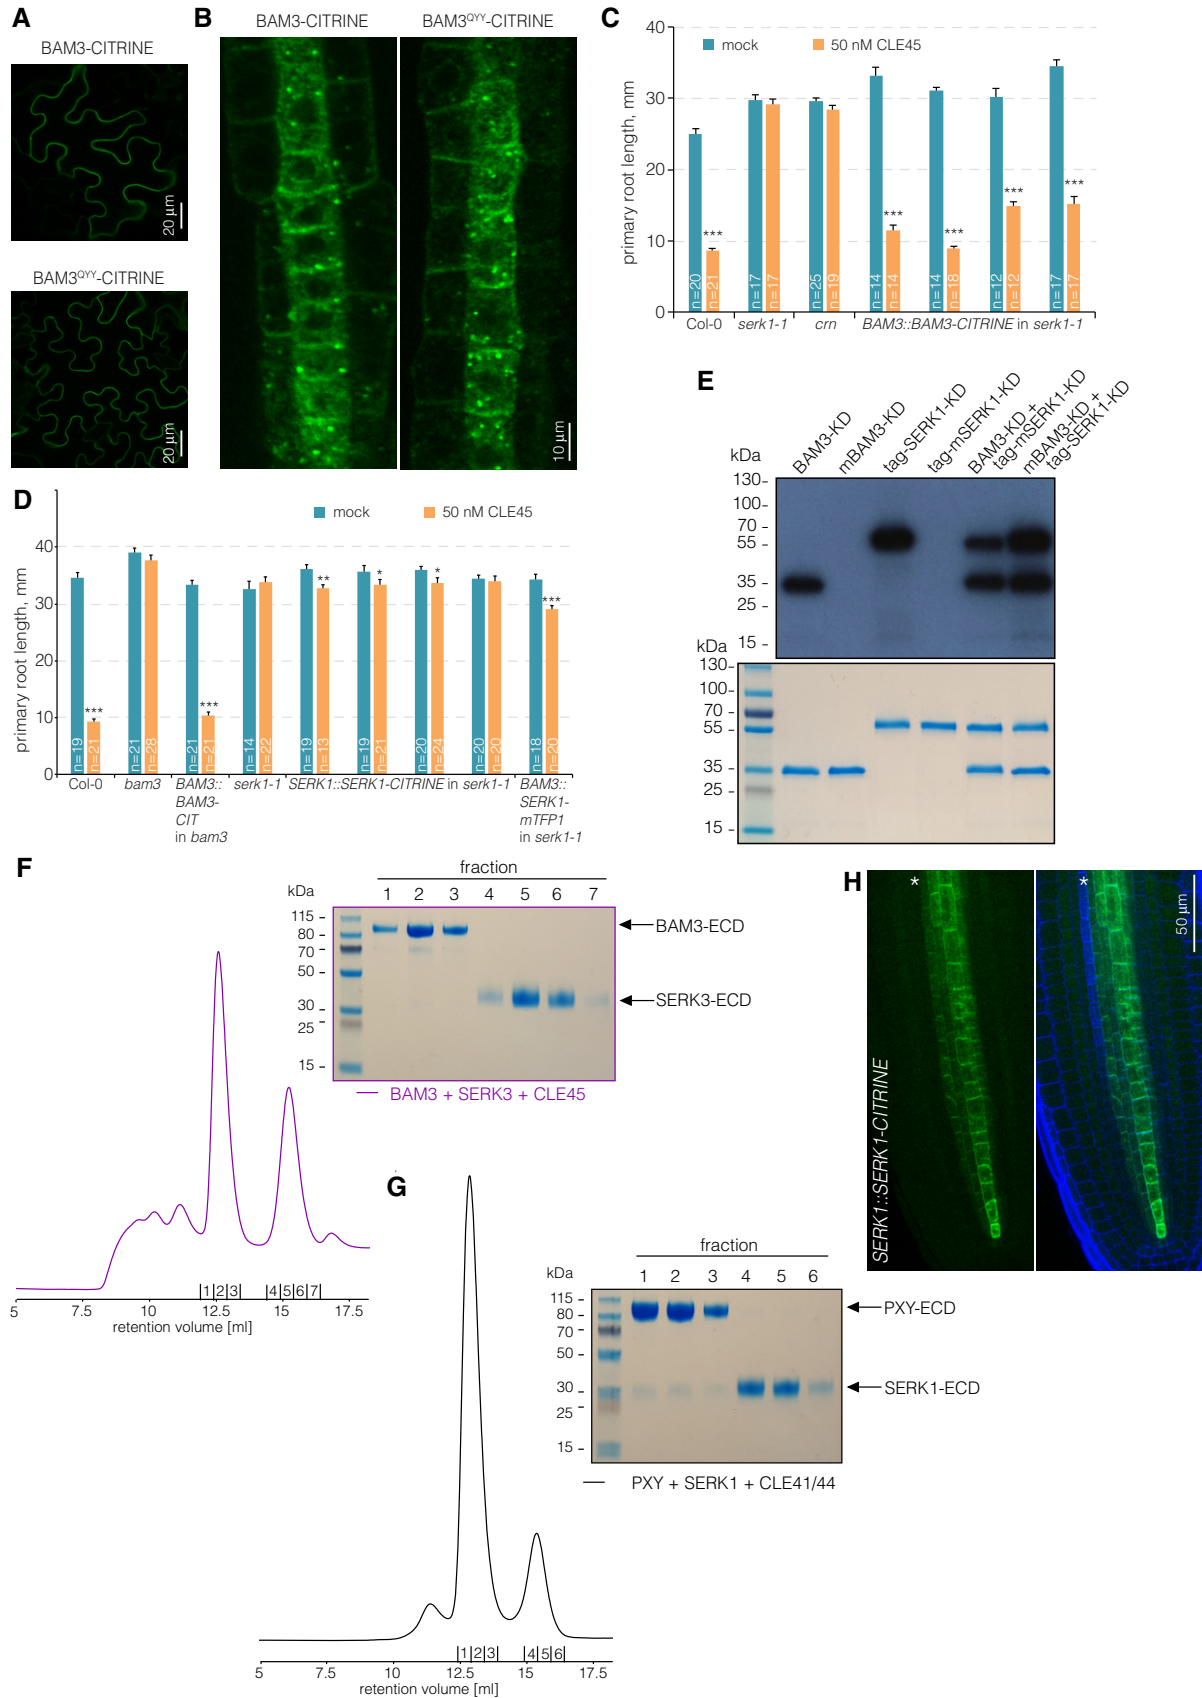

Figure EV2.

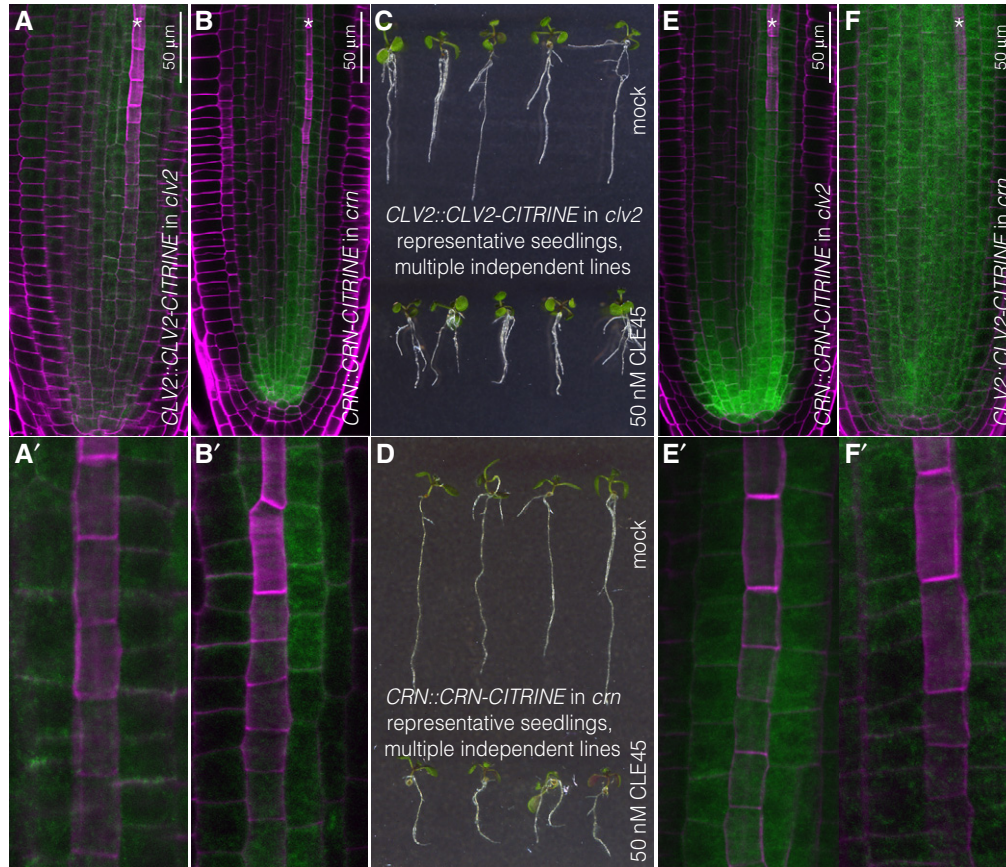

**Figure EV3. CLV2 and CRN localizations in *Arabidopsis* roots.**

- A Expression of CLV2-CITRINE fusion protein (green fluorescence) under control of the native promoter in *clv2* root meristems (magenta fluorescence: calcofluor white cell wall staining) (confocal microscopy). Asterisk marks developing protophloem sieve element strand. Close-up (A') with developing protophloem at the center is shown.
- B Same as in (A), for CRN-CITRINE fusion protein under control of the native promoter in *crn* root meristems.
- C Representative 5-day-old *clv2* seedlings expressing CLV2-CITRINE fusion protein under control of its native promoter grown on mock or CLE45.
- D Representative 5-day-old *crn* seedlings expressing CRN-CITRINE fusion protein under control of its native promoter grown on mock or CLE45.
- E Same as in (A), for CRN-CITRINE fusion protein under control of the native promoter in *clv2* root meristems.
- F Same as in (A), for CLV2-CITRINE fusion protein under control of the native promoter in *crn* root meristems.

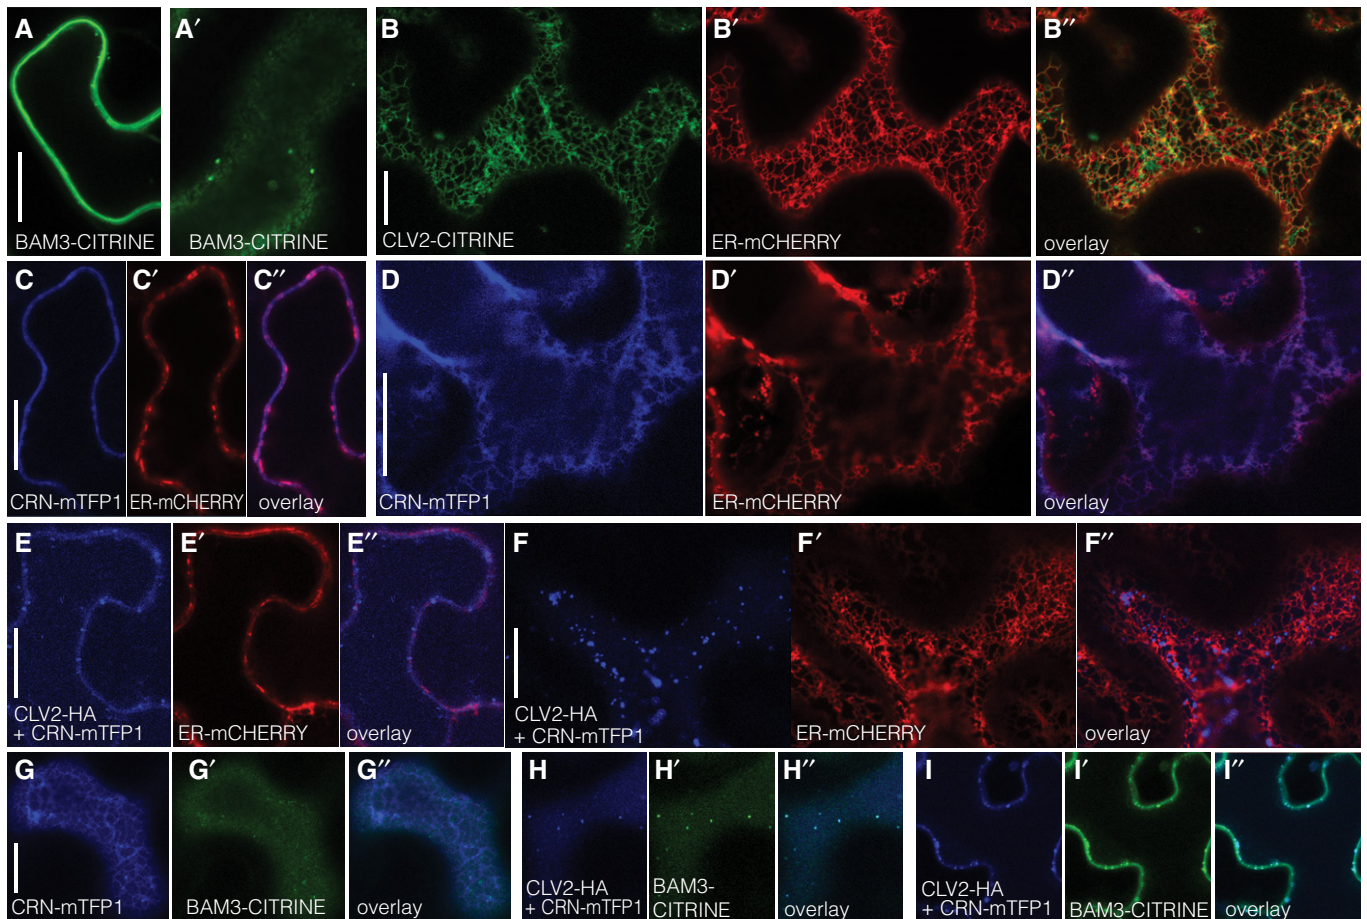

**Figure EV4. Tobacco co-localization, additional, and control experiments.**

- A Transient expression of BAM3-CITRINE fusion protein (green fluorescence) in tobacco (*Nicotiana benthamiana*) leaf epidermal cells, under control of a constitutive promoter (confocal microscopy), optical section through cell center. Panel (A'): same in cell surface view.
- B Transient co-expression of CLV2-CITRINE fusion protein (green fluorescence) and an endoplasmic reticulum marker (ER-mCHERRY, red fluorescence).
- C Transient co-expression of CRN-mTFP1 fusion protein (blue fluorescence) and the ER-mCHERRY marker (red fluorescence), optical section through cell center.
- D Same as (C), in cell surface view.
- E, F Corresponding to (C) and (D), in the additional presence of (non-fluorescent) CLV2-HA fusion protein.
- G Transient co-expression of CRN-mTFP1 (blue fluorescence) and BAM3-CITRINE (green fluorescence) fusion proteins, in cell surface view.
- H, I Transient co-expression of CRN-mTFP1 (blue fluorescence) and BAM3-CITRINE (green fluorescence) fusion proteins, in the additional presence of (non-fluorescent) CLV2-HA fusion protein. Panel (H): cell surface view. Panel (I): optical section through cell center.

Data information: Scale bars are 20  $\mu\text{m}$ .

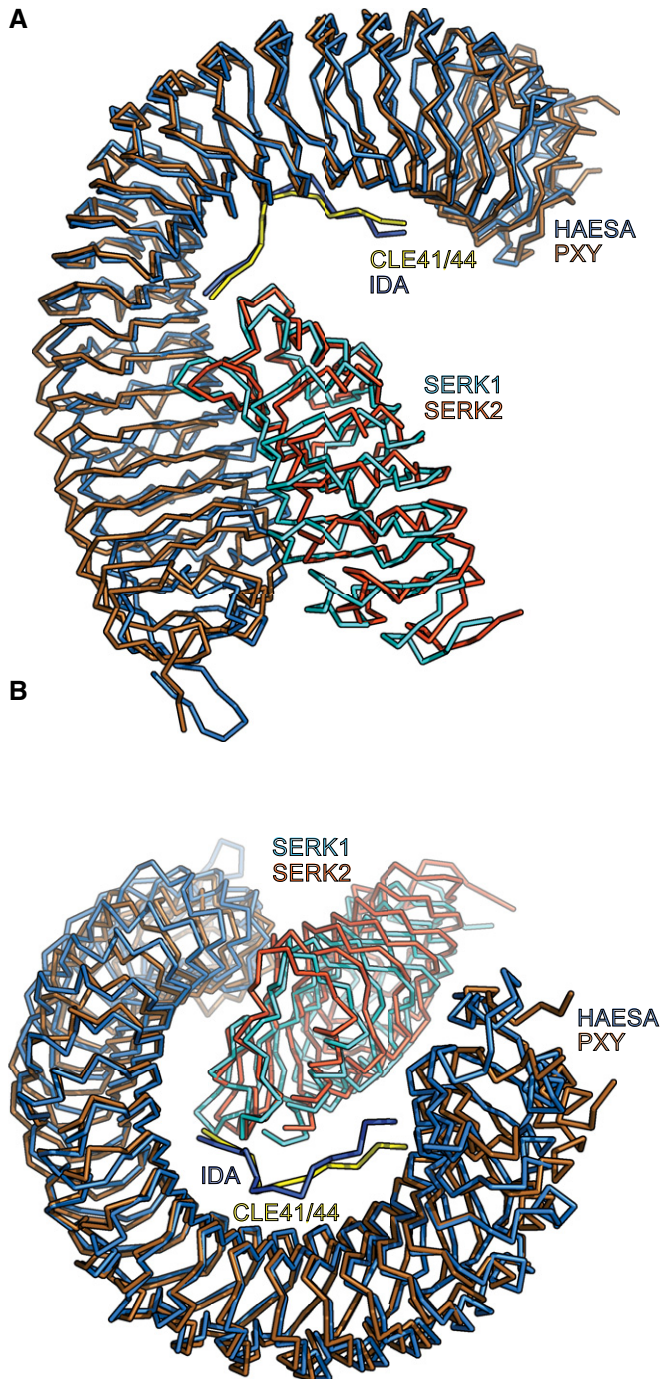

**Figure EV5. Structure comparison of HAESA-IDA-SERK1 and PXY-CLE41-SERK2 signaling complexes.**

A, B Structural superposition of HAESA-IDA-SERK1 (PDB-ID 5IYX, HAESA in light blue, IDA in dark blue, and SERK1 in cyan) (Santiago *et al*<sup>[30]</sup>) with a PXY-CLE41/44-SERK2 complex (PDB-ID 5GQR, PXY in gold, IDA in yellow, and SERK2 in orange) (Zhang *et al*<sup>[45]</sup>). The complexes closely align with an r.m.s.d. of 2.3 Å comparing 770 C $\alpha$  atoms.
